# Supplementary material for: High-resolution continuum source graphite furnace molecular absorption spectrometry for the monitoring of Sr isotopes via SrF formation: a case study
Source: Royal Society of Chemistry journal article supplement (doi:10.1039/d2ja00245k), 2022-01-01
Supplement: d2ja00245k1.pdf [file d2ja00245k1.pdf]

**Table S1.** Optimized temperature program used to generate and monitor the SrF molecule with liquid-phase fluorinating agents.

| Step         | Temperature (°C) | Ramp (°C s <sup>-1</sup> ) | Hold (s) | Ar gas flow (L min <sup>-1</sup> ) |
|--------------|------------------|----------------------------|----------|------------------------------------|
| Drying       | 80               | 6                          | 30       | 2                                  |
| Drying       | 90               | 3                          | 60       | 2                                  |
| Drying       | 120              | 5                          | 20       | 2                                  |
| Pyrolysis    | 800              | 300                        | 10       | 2                                  |
| Gas adaption | 800              | 0                          | 5        | 0                                  |
| Vaporization | 2400             | 2000                       | 5        | 0                                  |
| Cleaning     | 2600             | 500                        | 5        | 2                                  |

**Table S2.** Software conditions introduced to perform the temperature program collected in **Table 2** for gas-phase fluorinating agents.

| Step         | Temp<br>(°C) | Ramp<br>(°C/s) | Hold<br>(s) | Gas   |      |
|--------------|--------------|----------------|-------------|-------|------|
|              |              |                |             | Purge | Add  |
| Drying       | 80           | 6              | 20          | Max   | Stop |
| Drying       | 90           | 3              | 50          | Max   | Stop |
| Drying       | 120          | 5              | 10          | Max   | Stop |
| Pyrolysis    | 800          | 300            | 10          | Max   | Stop |
| Gas adaption | 800          | 0              | 5           | Stop  | Max  |
| Atomize      | 800          | 0              | 1           | Stop  | Max  |
| Clean        | 2400         | 2000           | 5           | Stop  | Stop |
| Clean        | 2600         | 500            | 4           | Max   | Stop |
